# Supplementary material for: Synergy of Cu-foam/Sb2O3/rGO for stable potassium anodes of high-rate and low-temperature potassium metal batteries
Source: Royal Society of Chemistry journal article supplement (doi:10.1039/d3ta06919b), 2024-01-01
Supplement: d3ta06919b1.pdf [file d3ta06919b1.pdf]

## Supporting Information

### **Synergy of Cu-Foam/Sb<sub>2</sub>O<sub>3</sub>/rGO for Stable Potassium Anodes of High-Rate and Low-Temperature Potassium Metal Batteries**

Jing Qi, Chengkai Lin, Shuqi Deng, Yinze Zuo, Hui Zheng, Xuechao Jiao, Wei Yan\*,  
Jiujun Zhang\*

Institute for New Energy Materials & Engineering, School of Materials Science & Engineering, Fuzhou University, Fuzhou City, Fujian Province, 350108, P.R. China

## Supporting Information

### 1. Preparation of PTCDA cathode

Firstly, Perylene-3,4,9,10-tetracarboxylic dianhydride (PTCDA) was pretreated and annealed at 420 °C for 2 hours with a heating rate of 5 °C/min. The pretreated PTCDA was mixed with Super P and PVDF in the mass ratio of 8:1:1 and then dripped into the appropriate amount of N-methyl-2-pyrrolidone (NMP). After stirring for 6 hours, the slurry was evenly coated on the aluminum foil and dried at 60 °C for 12 hours. The PTCDA mass loading on the cathode was about 1 mg cm<sup>-2</sup>.

### 2. Electrochemical measurements

The loss of active K was evaluated using the average coulombic efficiency (CE<sub>ave</sub>). According to the methods outlined in relevant literature, the average coulombic efficiency of n cycles is determined by the following Equation (S1):

$$CE_{ave}=(nQ_C+Q_S)/(nQ_C+Q_T) \quad (1)$$

where n is the cycled numbers of 10 times, Q<sub>T</sub> is 2 mAh cm<sup>-2</sup> capacity that is initially utilized to deposit K onto the current collector surface, Q<sub>C</sub> is a smaller portion of 0.5 mAh cm<sup>-2</sup>, Q<sub>S</sub> is the final stripping capacity after charging to the cut-off voltage of 1 V at the currently density of 0.5 mA cm<sup>-2</sup>, respectively.

### 3. Computational Section

Electronic structure calculations were performed with the density functional theory as implemented in the Vienna ab initio simulation package<sup>1,2</sup>, employing the projected augmented wave potential to describe the atomic core electrons and the plane wave basis set to expand the Kohn-Sham electronic states<sup>3</sup>. For the exchange and correlation functional, the generalized gradient approximation (GGA) in the Perdew-Burke-Ernzerhof (PBE) format was used<sup>4</sup>. The kinetic energy cutoff was set to 400 eV and the Gamma centered method was employed for the Brillouin zone sampling for all calculations in this work. For the bulk structures of Cu<sub>2</sub>Sb, rGO and Sb<sub>2</sub>O<sub>3</sub>, the convergence criteria energy for geometric optimization was 10<sup>-5</sup> eV/atom and all the atoms were fully relaxed until the atomic forces are less than 0.01 eV Å<sup>-1</sup>. For the other

models, force calculations were set to 0.05 eV Å<sup>-1</sup>.

The Cu<sub>2</sub>Sb-K, rGO-K and Sb<sub>2</sub>O<sub>3</sub>-K model were constructed by the 2×4 supercell. The adsorption energy ( $E_{ad}$ ) was calculated as:  $E_{ad} = (E_{Cu_2Sb-K} - E_{Cu_2Sb} - E_K)$ , where,  $E_{Cu_2Sb-K}$ ,  $E_{Cu_2Sb}$  and  $E_K$  represent the DFT energies of the K<sup>+</sup> adsorbed Cu<sub>2</sub>Sb, the pure Cu<sub>2</sub>Sb and the K atom in the bulk phase, respectively.

#### 4. Calculation of rGO and Sb<sub>2</sub>O<sub>3</sub> loading on Cu foam

The commercial Cu foam (0.5 mm in thickness) was cut into wafers with a square piece of 20x20 mm, the weight of Cu foam after treated with 3 mol L<sup>-1</sup> HCl and acetone solution was measured and recorded as  $m_1$ , the weight of Cu@Cu<sub>2</sub>Sb recorded as  $m_2$ , the weight of Cu@Cu<sub>2</sub>Sb@GO recorded as  $m_3$  and the weight of Cu@Sb<sub>2</sub>O<sub>3</sub>@rGO recorded as  $m_4$ . The specific weights are shown in Table S1. The mass loading of rGO and Sb<sub>2</sub>O<sub>3</sub> were calculated according to those equations by taking Sample 1 as an example:

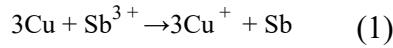

$$n_{Sb} = \frac{m_2 - m_1}{M_{Sb} - 3 \times M_{Cu}} = \frac{(232.39 - 237.92) \text{ mg}}{(121.8 - 3 \times 63.5) \text{ mol/g}} = 0.08 \text{ mmol} \quad (2)$$

$$m_{Sb} = n_{Sb} \times 121.8 = 9.8 \text{ mg} \quad (3)$$

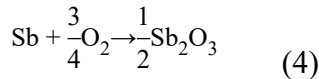

$$m_{Sb_2O_3} = n_{Sb} \times \frac{1}{2}M_{Sb_2O_3} = 0.08 \times 145.8 = 11.67 \text{ mg} \quad (5)$$

$$\Delta m = n_{Sb} \times \left( \frac{1}{2}M_{Sb_2O_3} - M_{Sb} \right) = 0.08 \times \left( \frac{1}{2} \times 291.6 - \frac{3}{4} \times 32 - 121.8 \right) = 1.92 \text{ mg} \quad (6)$$

$$m_{rGO} = m_4 - m_2 - \Delta m = 234.72 - 232.39 - 1.92 = 0.41 \text{ mg} \quad (7)$$

Therefore, as shown in Table S1, the final mass loading of rGO and Sb<sub>2</sub>O<sub>3</sub> on the Cu foam is 0.1~0.11 mg cm<sup>-2</sup> and 2.92~3.65 mg cm<sup>-2</sup>, respectively.

**Table S1.** Table of Cu@Sb<sub>2</sub>O<sub>3</sub>@rGO mass changes during synthesis.

| Sample \ Mass (mg) | Cu (m <sub>1</sub> ) | Cu@Cu <sub>2</sub> Sb (m <sub>2</sub> ) | Cu@Cu <sub>2</sub> Sb@GO (m <sub>3</sub> ) | Cu@Sb <sub>2</sub> O <sub>3</sub> @rGO (m <sub>4</sub> ) | Sb <sub>2</sub> O <sub>3</sub> (mg cm <sup>-2</sup> ) | rGO (mg cm <sup>-2</sup> ) |
|--------------------|----------------------|-----------------------------------------|--------------------------------------------|----------------------------------------------------------|-------------------------------------------------------|----------------------------|
| Sample 1           |                      |                                         |                                            |                                                          |                                                       |                            |

|          |        |        |        |        |      |      |
|----------|--------|--------|--------|--------|------|------|
| Sample 1 | 237.92 | 232.39 | 232.82 | 234.72 | 2.92 | 0.1  |
| Sample 2 | 226.21 | 219.22 | 219.63 | 222.00 | 3.65 | 0.1  |
| Sample 3 | 256.39 | 250.00 | 250.49 | 252.61 | 3.28 | 0.11 |

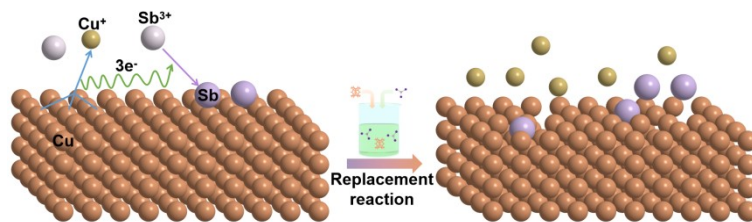

**Fig. S1** Schematic illustrating of the replacement reaction.

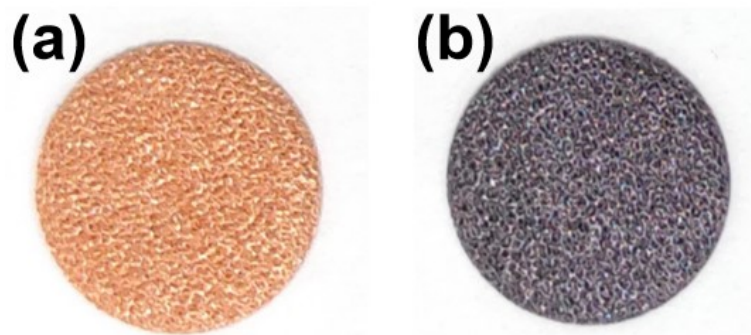

**Fig. S2** The digital photos of Cu foam (a) before and (b) after the incubation.

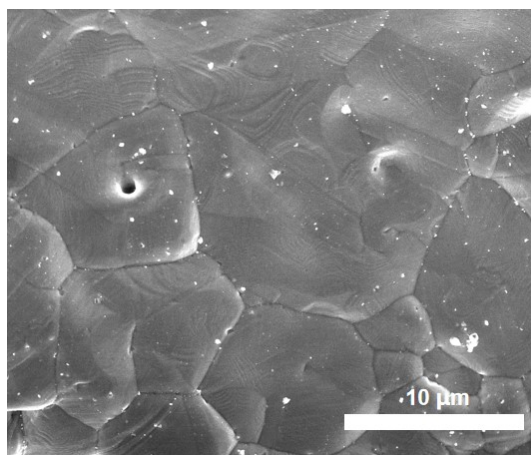

**Fig. S3** SEM image of Cu foam.

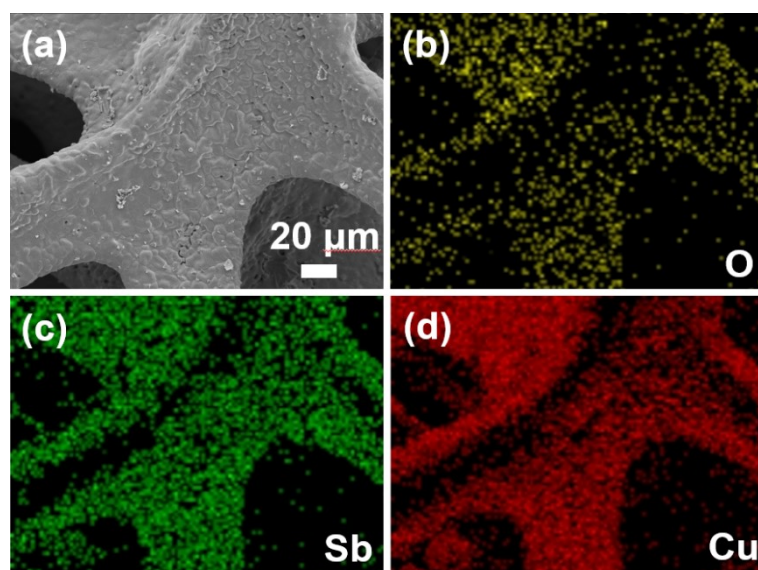

**Fig. S4** The EDS of Cu foam after the incubation.



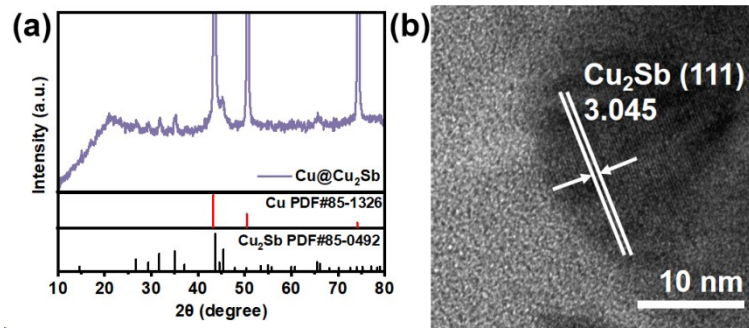

**Fig. S5 (a)** The XRD patterns of Cu foam and Cu@Cu<sub>2</sub>Sb, **(b)** The HRTEM image of Cu@Cu<sub>2</sub>Sb.

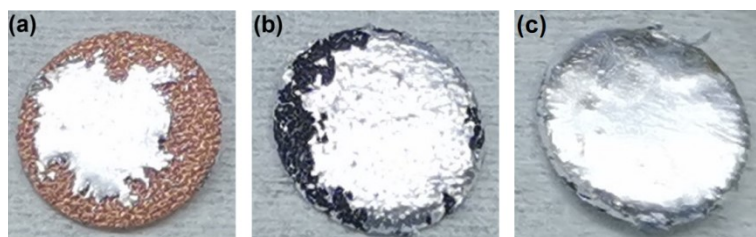

**Fig. S6** The digital photos of (a) Cu foam@molten K, (b) Cu@Cu<sub>2</sub>Sb@molten K, (c) Cu@Sb<sub>2</sub>O<sub>3</sub>@rGO@molten K.

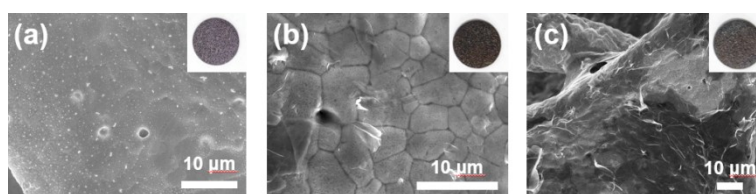

**Fig. S7** The SEM images of different current collectors: (a) Cu@Cu<sub>2</sub>Sb; (b) GO loaded onto Cu@Cu<sub>2</sub>Sb; (c) Cu@Sb<sub>2</sub>O<sub>3</sub>@rGO.

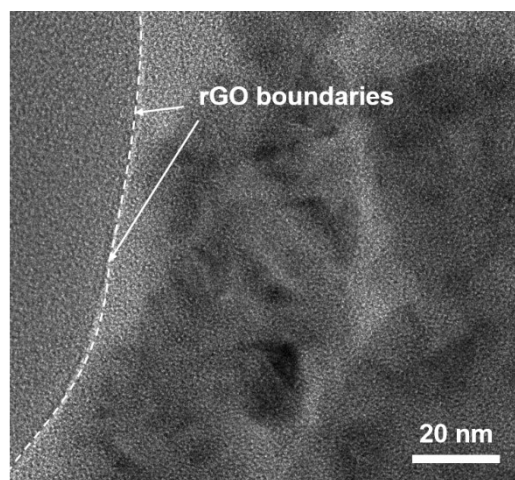

**Fig. S8** The TEM image of Cu@Sb<sub>2</sub>O<sub>3</sub>@rGO.

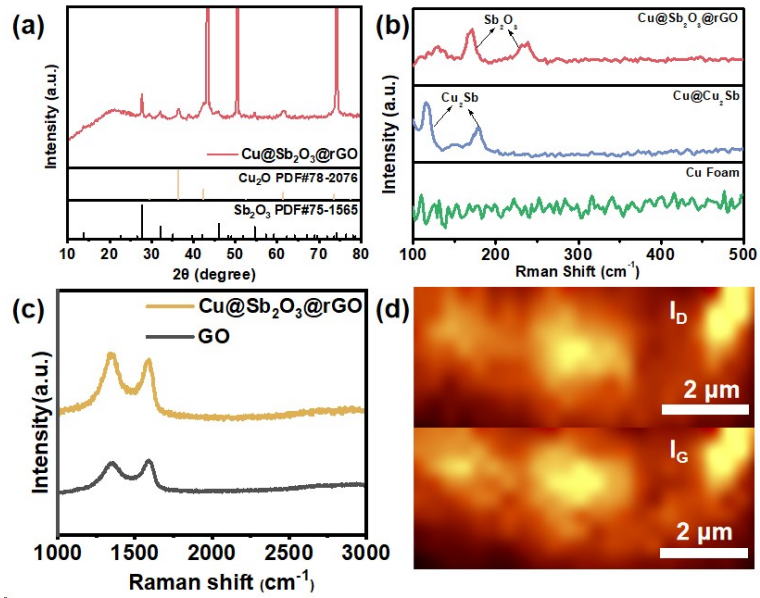

**Fig. S9** (a) The XRD pattern of Cu@Sb<sub>2</sub>O<sub>3</sub>@rGO, (b) The Raman spectra of Cu foam, Cu@Cu<sub>2</sub>Sb and Cu@Sb<sub>2</sub>O<sub>3</sub>@rGO. (c) the Raman spectra of GO and Cu@Sb<sub>2</sub>O<sub>3</sub>@rGO; (d) the cross-sectional Raman spectroscopic analysis of Cu@Sb<sub>2</sub>O<sub>3</sub>@rGO.

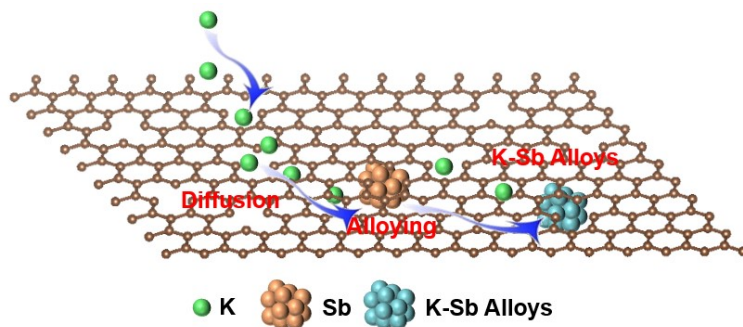

**Fig. S10** Illustration of intercalation, diffusion and deposition of  $K^+$  on  $Cu@Sb_2O_3@rGO$ .

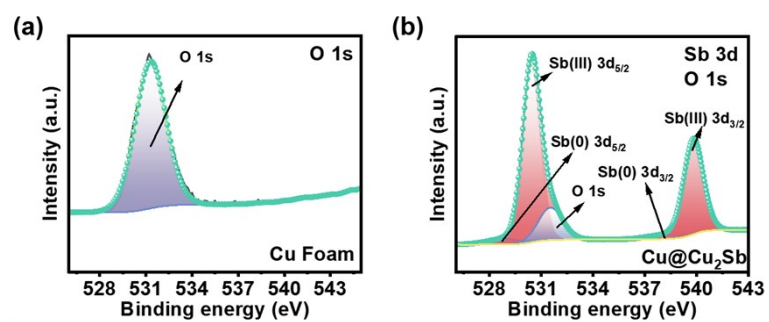

**Fig. S11** XPS spectra of O 1s of (a) Cu foam, and (b) O 1s & Sb 3d of Cu@Cu<sub>2</sub>Sb.

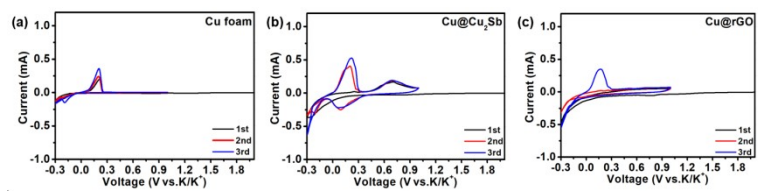

**Fig. S12** CV curves of (a) Cu foam, (b) Cu@Cu<sub>2</sub>Sb, (c) Cu@rGO.



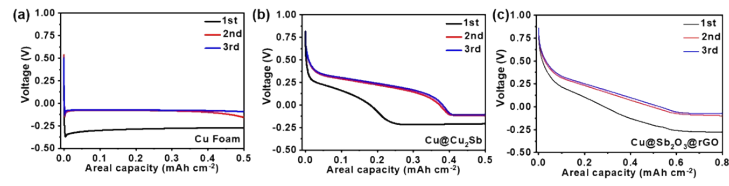

**Fig. S13** First three cycles of K plating voltage profile of different current collectors at  $0.5 \text{ mA cm}^{-2}$  with capacity of  $1 \text{ mAh cm}^{-2}$ : (a) Cu foam, (b) Cu@Cu<sub>2</sub>Sb, (c) Cu@Sb<sub>2</sub>O<sub>3</sub>@rGO

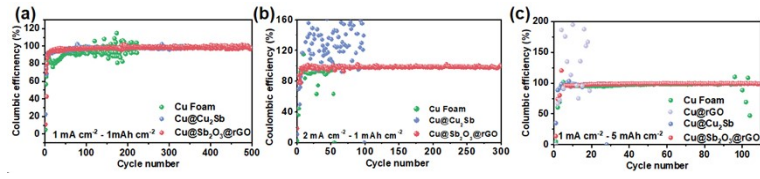

**Fig. S14** Coulombic efficiencies (CE) of Cu foam, Cu@Cu<sub>2</sub>Sb and Cu@Sb<sub>2</sub>O<sub>3</sub>@rGO (a) at 1 mA cm<sup>-2</sup> and 1 mAh cm<sup>-2</sup>, (b) at 2 mA cm<sup>-2</sup> and 1 mAh cm<sup>-2</sup>. (c) Coulombic efficiencies (CE) of Cu foam, Cu@rGO, Cu@Cu<sub>2</sub>Sb and Cu@Sb<sub>2</sub>O<sub>3</sub>@rGO at 1 mA cm<sup>-2</sup> and 5 mAh cm<sup>-2</sup>.

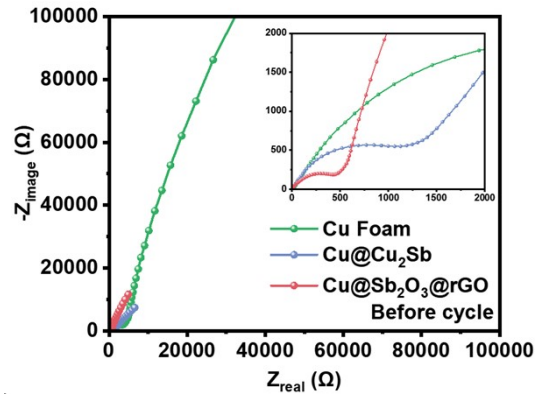

**Fig. S15** The Nyquist plots of fresh half cells of different current collectors.

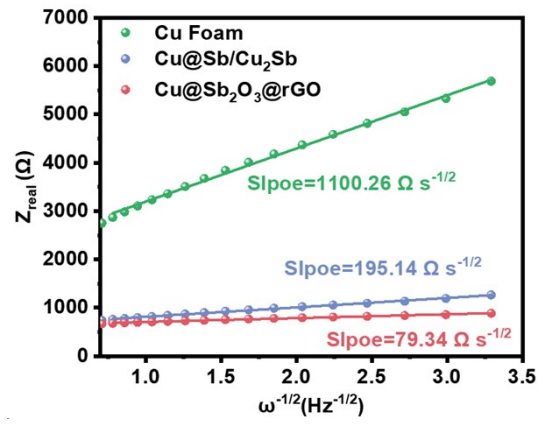

**Fig. S16** Extracted  $|Z|$  vs.  $\omega^{1/2}$  plot in the Warburg region for different current collectors, respectively.

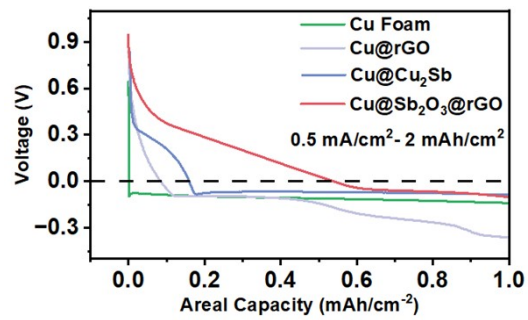

**Fig. S17** The third cycle of K plating voltage profile of different current collectors at  $0.5 \text{ mA cm}^{-2}$  with capacity of  $2 \text{ mAh cm}^{-2}$ .

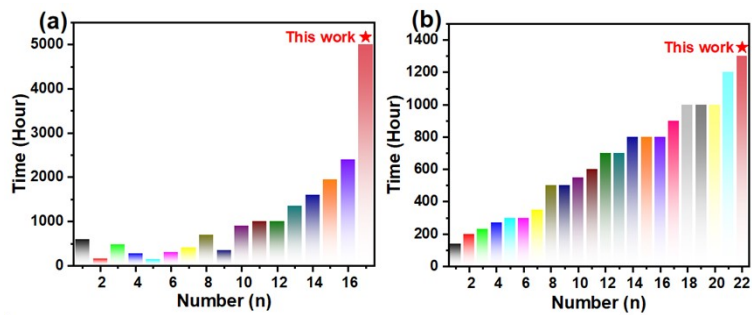

**Fig. S18** Comparison of the cycle-life of Cu@Sb<sub>2</sub>O<sub>3</sub>@rGO with (a) half cells and (b) previously reported symmetric cells that used different strategies to improve the stability of KMBs.

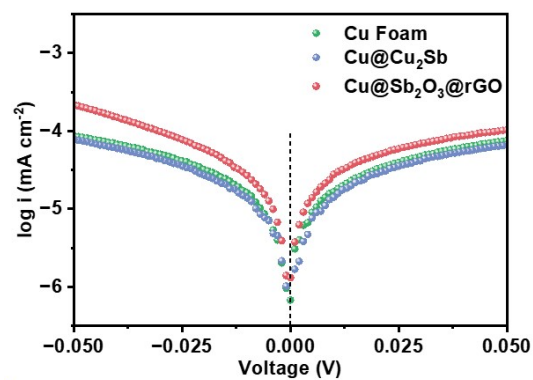

**Fig. S19** Tafel curves of Cu Foam@K, Cu@Cu<sub>2</sub>Sb@K and Cu@Sb<sub>2</sub>O<sub>3</sub>@rGO@K symmetric cells at a scan rate of 0.5 mV s<sup>-1</sup>.

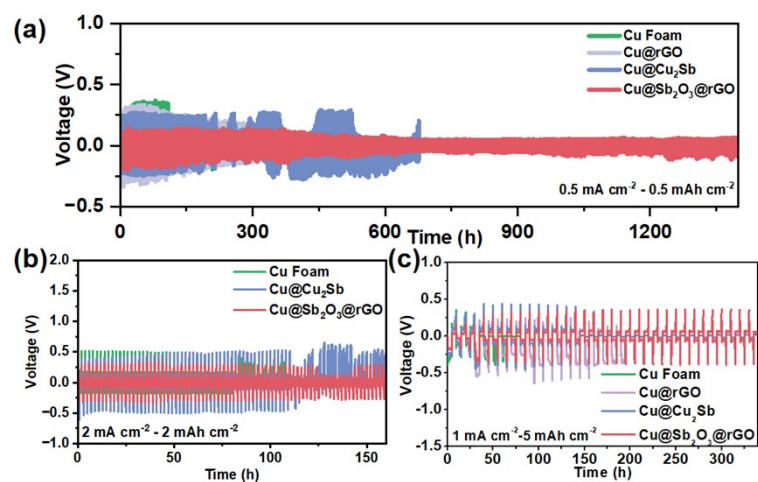

**Fig. S20** The cyclic stability of the symmetric cells at (a)  $0.5 \text{ mA cm}^{-2}$ ,  $0.5 \text{ mAh cm}^{-2}$  (b)  $2 \text{ mA cm}^{-2}$ ,  $2 \text{ mAh cm}^{-2}$  and (c)  $1 \text{ mA cm}^{-2}$ ,  $5 \text{ mAh cm}^{-2}$  of different current collectors.



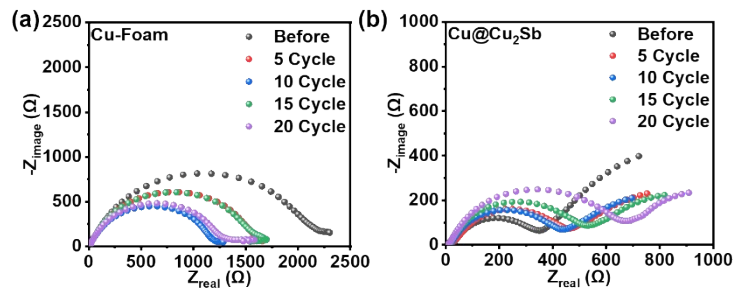

**Fig. S21** EIS Nyquist plots of Cu@Cu<sub>2</sub>Sb@K||Cu@Cu<sub>2</sub>Sb@K and Cu Foam@K||Cu Foam@K symmetric cells collected at 5, 10, 15, 20 cycle.

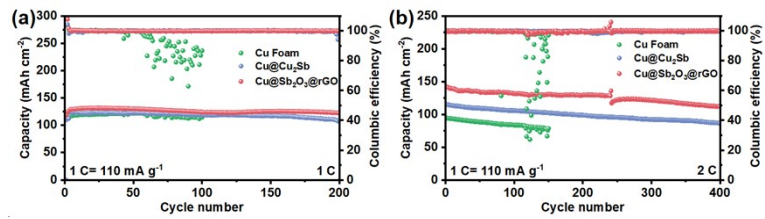

**Fig. S22** Cycling at a current rate of (a) 1 C and (b) 2 C of Cu foam@K, Cu@Cu<sub>2</sub>Sb@K and Cu@Sb<sub>2</sub>O<sub>3</sub>@rGO@K full cells (1 C=110 mAh g<sup>-1</sup>).

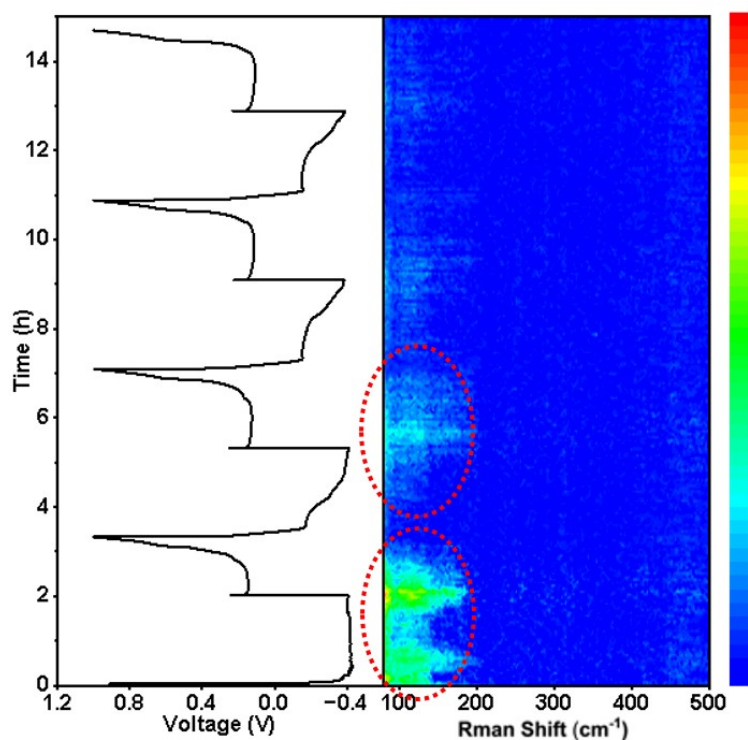

**Fig. S23** In-situ Raman spectra of  $K_x\text{Sb}$  near anode electrolyte interface during  $\text{Cu@Sb}_2\text{O}_3@\text{rGO}$  operation at the plating/stripping current density of  $1 \text{ mA cm}^{-2}$  with areal capacity of  $2 \text{ mAh cm}^{-2}$ .

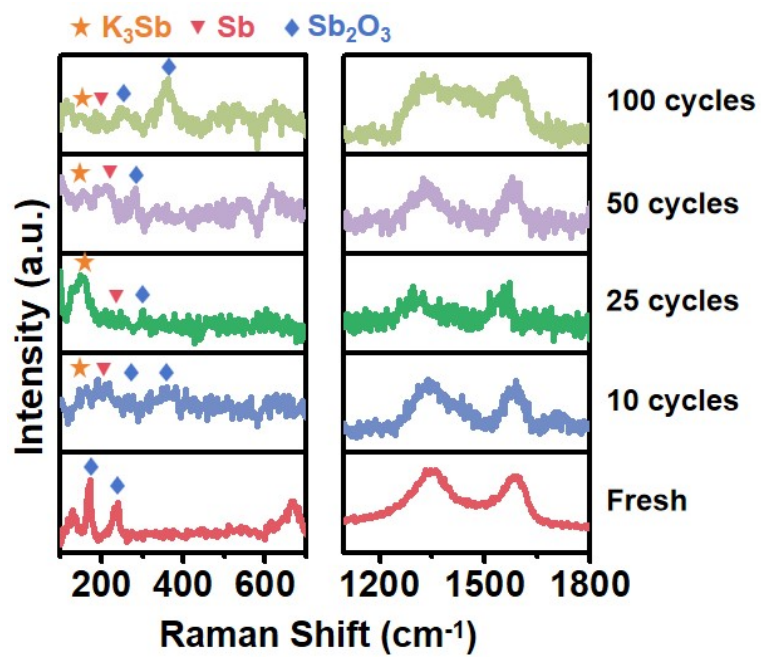

**Fig. S24** The Raman spectra of the Cu@Sb<sub>2</sub>O<sub>3</sub>@rGO with different cycles.

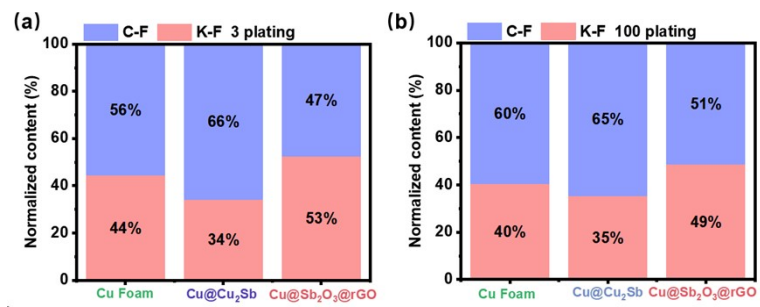

**Fig. S25** The corresponding elemental content analysis of F 1s at 3rd and 100th cycle.

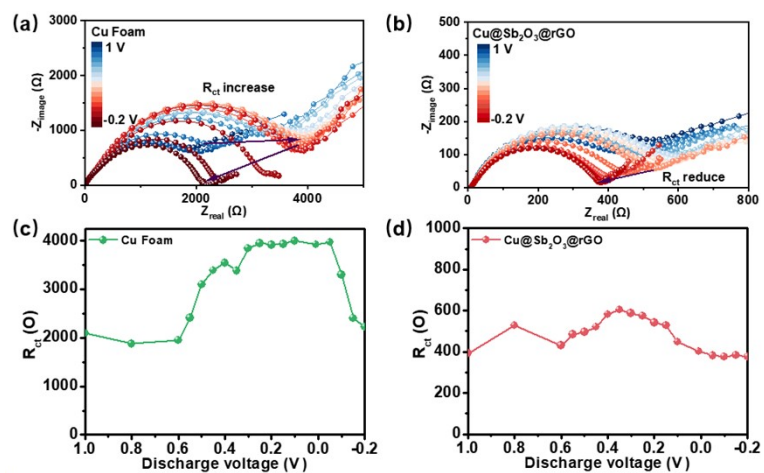

**Fig. S26** The EIS Nyquist plots of Cu foam and Cu@Sb<sub>2</sub>O<sub>3</sub>@rGO electrode were collected at plating current density of 0.5 mA cm<sup>-2</sup> with different potentials, the voltage range at -0.2 - 1 V.

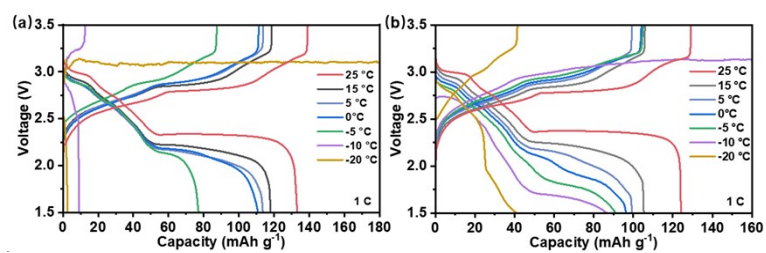

**Fig. S27** Charging-discharging profiles of (a) Cu foam@K||PTCDA and (b) Cu@Cu<sub>2</sub>Sb@K||PTCDA full cell at 1 C for different temperatures.

**Table S2.** Half cell comparison.

| Materials                              | Electrolytes                        | Current-Capacity<br>(mA cm <sup>-2</sup> -<br>mAh cm <sup>-2</sup> ) | Cycle numbers | CE     | Reference |
|----------------------------------------|-------------------------------------|----------------------------------------------------------------------|---------------|--------|-----------|
| Bare Cu foil                           | 1M or 5M KFSI in DME                | 0.05-0.15                                                            | 100           | 99%    | 6         |
| rGO@3D-Cu                              | 0.8 M KPF <sub>6</sub> in EC/DEC/PC | 0.5-0.5                                                              | 100 (160h)    | 76%    | 7         |
| DN-MXene/CNT                           | 0.8 M KPF <sub>6</sub> in EC/DEC    | 0.5-1                                                                | 120           | 93.1%  | 8         |
| Cu <sub>3</sub> Pt-Cu mesh             | 1 M KFSI in DME                     | 0.5-0.5                                                              | 150 (270h)    | 95%    | 9         |
| Ag-CC                                  | 0.8 M KPF <sub>6</sub> in EC/DEC    | 1-0.5                                                                | 150           | 99.5%  | 10        |
| PCNF@SnO <sub>2</sub> -K               | 1 M KFSI in DME                     | 1-1                                                                  | 150           | 98.3%  | 11        |
| AlF <sub>3</sub> @PP                   | 4 M KFSI in DME                     | 0.5-0.5                                                              | 200 (398h)    | -      | 12        |
| CBC-K                                  | 1 M KFSI in DME                     | 1-1                                                                  | 350           | ~98%   | 13        |
| CoZn@HCT                               | 1 M KFSI in DME                     | 1-0.5                                                                | 350           | 96.9%  | 14        |
| Pd/Cu foam                             | 3 M KFSI in DME                     | 0.5-0.5                                                              | 450           | 98%    | 15        |
| Al@G                                   | 4 M KFSI in DME                     | 0.5-0.5                                                              | 500           | 99%    | 16        |
| Cu@SKS                                 | 4 M KFSI in DME                     | 1-1                                                                  | 500 (1000h)   | 99.1%  | 17        |
| Bi <sub>80</sub> /NrGO                 | 3 M KFSI in DME                     | 0.1-0.1                                                              | 675 (1350h)   | 99.6%  | 18        |
| NC@GDY-Al                              | 4 M KFSI in DME                     | 0.2-0.2                                                              | 800           | 99.93% | 19        |
| Al@Al                                  | 4 M KFSI in DME                     | 0.5-0.5                                                              | 1000 (1950h)  | 98.9%  | 20        |
| Cu@Sb <sub>2</sub> O <sub>3</sub> @rGO | 3M KFSI in DME                      | 0.5-1                                                                | 600 (2400h)   | 99.9%  | This Work |
|                                        |                                     | 0.5-2                                                                | 620 (~5000h)  | 99.9%  |           |





**Table S3.** Symmetric cell comparison.

| Materials                              | Current density (mA cm <sup>-2</sup> ) | Cycling stability (hour) | Reference |
|----------------------------------------|----------------------------------------|--------------------------|-----------|
| CFC/KOL@Na-K                           | 0.4                                    | 140                      | 21        |
| rGO@3D-Cu                              | 0.5                                    | 200                      | 7         |
| K-ACM                                  | 1                                      | 230                      | 22        |
| rGO-K                                  | 2                                      | 270                      | 23        |
| K@Cu <sub>3</sub> Pt-Cu                | 0.5                                    | 300                      | 9         |
| K@DN-Mxene/CNT                         | 0.5                                    | 300                      | 8         |
| Amine-Wetting<br>K@CC                  | 1                                      | 350                      | 24        |
| Sn@3D-K                                | 0.2                                    | 500                      | 25        |
| K@CNTs                                 | 1                                      | 500                      | 26        |
| KxPy@K                                 | 0.5                                    | 550                      | 27        |
| Na-K@rGO                               | 1                                      | 600                      | 28        |
| PVA-Borax@Cu                           | 0.5                                    | 700                      | 29        |
| K@Ag-CC                                | 0.5                                    | 700                      | 10        |
| K@K <sub>2</sub> Te                    | 0.5                                    | 800                      | 30        |
| K@SnS <sub>2</sub> @CP                 | 0.25                                   | 800                      | 31        |
| K-OPCMs/K                              | 1                                      | 800                      | 32        |
| Cu@SKS                                 | 1                                      | 900                      | 17        |
| AgLF/NNFS-NaK                          | 0.4                                    | 1000                     | 33        |
| K@hoCNT                                | 0.5                                    | 1000                     | 34        |
| K <sub>2</sub> Se/Cu@K                 | 0.5                                    | 1000                     | 35        |
| CoZn@HCT@K                             | 0.5                                    | 1200                     | 14        |
| Cu@Sb <sub>2</sub> O <sub>3</sub> @rGO | 0.2                                    | 1300                     | This Work |

**Table S4.** The  $I_D/I_G$  values of the Cu@Sb<sub>2</sub>O<sub>3</sub>@rGO with different cycles.

| Sample    | Fresh | 10 cycles | 25 cycles | 50 cycles | 100 cycles |
|-----------|-------|-----------|-----------|-----------|------------|
| $I_D/I_G$ | 1.03  | 1.04      | 1.03      | 1.03      | 1.04       |

## References

1. J. P. Perdew, J. A. Chevary, S. H. Vosko, K. A. Jackson, M. R. Pederson, D. J. Singh and C. Fiolhais, *Phys. Rev. B*, 1992, **46**, 6671-6687.
2. G. Kresse and J. Furthmuller, *Phys. Rev. B*, 1996, **54**, 11169-11186.
3. P. E. Blöchl, *Phys. Rev. B*, 1994, **50**, 17953-17979.
4. J. P. Perdew, K. Burke and M. Ernzerhof, *Phys. Rev. Lett.*, 1996, **77**, 3865-3868.
5. R. F. W. Bader, *Phys. Rev. B*, 1994, **49**, 13348-13356.
6. N. Xiao, W. D. McCulloch and Y. Y. Wu, *J. Am. Chem. Soc.*, 2017, **139**, 9475-9478.
7. P. Liu, Y. Wang, Q. Gu, J. Nanda, J. Watt and D. Mitlin, *Adv. Mater.*, 2019, **32**, e1906735.
8. X. Tang, D. Zhou, P. Li, X. Guo, B. Sun, H. Liu, K. Yan, Y. Gogotsi and G. Wang, *Adv. Mater.*, 2019, **32**, e1906739.
9. J. Wang, J. Yuan, C. Chen, L. Wang, Z. Zhai, Q. Fu, Y. Liu, L. Dong, W. Yan, A. Li and J. Zhang, *Nano Energy*, 2020, **75**, 104914.
10. J. H. Zhang, Y. Q. Li, L. P. Zhu, X. L. Wang and J. P. Tu, *Chem. Eng. J.*, 2022, **449**, 137659.
11. X. X. Zhao, F. J. Chen, J. Q. Liu, M. R. Cheng, H. Su, J. B. Liu and Y. H. Xu, *J. Mater. Chem. A*, 2020, **8**, 5671-5678.
12. P. Liu, H. Hao, H. Celio, J. Cui, M. Ren, Y. Wang, H. Dong, A. R. Chowdhury, T. Hutter, F. A. Perras, J. Nanda, J. Watt and D. Mitlin, *Adv. Mater.*, 2021, **34**, e2105855.
13. M. F. Zhou, W. Y. Qi, Z. M. Hu, M. R. Cheng, X. X. Zhao, P. X. Xiong, H. Su, M. J. Li, J. M. Hu and Y. H. Xu, *ACS Appl. Mater. Interfaces*, 2021, **13**, 17629-17638.
14. G. Z. Cheng, S. Liu, X. J. Wang, X. R. Li, Q. D. Y. X. Su, J. Shi, M. H. Huang, Z. C. Shi, H. L. Wang and Z. H. Yan, *ACS Appl. Mater. Interfaces*, 2022, **14**, 45364-45372.
15. J. Y. Wang, W. Yan and J. J. Zhang, *Nano Energy*, 2022, **96**, 107131.
16. Y. Zhao, B. Z. Liu, Y. Y. Yi, X. Y. Lian, M. L. Wang, S. Li, X. Z. Yang and J. Y. Sun, *Adv. Mater.*, 2022, **34**, e2202902.

17. J. Xie, Y. Ji, L. Ma, Z. Wen, J. Pu, L. Wang, S. Ding, Z. Shen, Y. Liu, J. Li, W. Mai and G. Hong, *ACS Nano*, 2023, **17**, 1511-1521.
18. Y. H. Feng, A. M. Rao, J. Zhou and B. A. Lu, *Adv. Mater.*, 2023, **35**, e2300886.
19. Y. Y. Yi, J. Q. Li, Z. X. Gao, W. F. Liu, Y. Zhao, M. L. Wang, W. Zhao, Y. Han, J. Y. Sun and J. Zhang, *Adv. Mater.*, 2022, **34**, e2202685.
20. P. C. Liu, Y. X. Wang, H. C. Hao, S. Basu, X. Y. Feng, Y. X. Xu, J. A. Boscoboinik, J. Nanda, J. Watt and D. Mitlin, *Adv. Mater.*, 2020, **32**, e2002908.
21. L. Y. Zhang, X. H. Xia, Y. Zhong, D. Xie, S. F. Liu, X. L. Wang and J. P. Tu, *Adv. Mater.*, 2018, **30**, e1804011.
22. L. Qin, Y. Lei, H. W. Wang, J. H. Dong, Y. Y. Wu, D. Y. Zhai, F. Y. Kang, Y. Tao and Q. H. Yang, *Adv. Energy Mater.*, 2019, **9**, 1901427.
23. Z. H. Wei, A. X. Wang, X. Z. Guan, G. J. Li, Z. W. Yang, C. D. Huang, J. Zhang, L. B. Ren, J. Y. Luo and X. J. Liu, *Energy Environ. Mater.*, 2022, **5**, 1278-1284.
24. J. S. Meng, H. Z. Zhu, Z. T. Xiao, X. C. Zhang, C. J. Niu, Y. K. Liu, G. P. Jiang, X. P. Wang, F. Qiao, X. F. Hong, F. Liu, Q. Q. Pang and L. Q. Mai, *Acs Nano*, 2022, **16**, 7291-7300.
25. M. Ye, J. Y. Hwang and Y. K. Sun, *ACS Nano*, 2019, **13**, 9306-9314.
26. Y. J. Yang, C. Huang, Y. Zhang, Y. X. Wu, X. Zhao, Y. Qian, G. Chang, Q. L. Tang, A. P. Hu and X. H. Chen, *ACS Appl. Mater. Interfaces*, 2022, **14**, 55577-55586.
27. P. C. Shi, S. P. Zhang, G. X. Lu, L. F. Wang, Y. Jiang, F. F. Liu, Y. Yao, H. Yang, M. Z. Ma, S. F. Ye, X. Y. Tao, Y. Z. Feng, X. J. Wu, X. H. Rui and Y. Yu, *Adv. Energy Mater.*, 2021, **11**, 2003381.
28. T. T. Luo, Q. Q. Zhao, Y. W. Liu, W. D. Meng, Q. Sun, L. Dai, S. Liu and L. Wang, *Ecomat*, 2022, **4**, e12203.
29. S. Wang, Y. Yan, D. Xiong, G. Li, Y. Wang, F. Chen, S. Chen, B. Tian and Y. Shi, *Angew. Chem. Int. Ed.*, 2021, **60**, 25122-25127.
30. H. Yang, F. He, M. Li, F. Huang, Z. Chen, P. Shi, F. Liu, Y. Jiang, L. He, M. Gu and Y. Yu, *Adv. Mater.*, 2021, **33**, e2106353.
31. M. Han, J. Jiang, S. Lu, Y. Jiang, W. Ma, X. Liu, B. Zhao and J. Zhang, *ACS Appl.*

*Mater. Interfaces*, 2022, **14**, 900-909.

32. S. H. Xie, W. Xie, Q. F. Zhang, X. L. Cheng, X. P. Ouyang and B. A. Lu, *Adv. Funct. Mater.*, 2023, **33**, 2302880.

33. Y. S. Luo, P. Z. Mou, W. L. Yuan, L. P. Li, Y. Z. Fan, Y. Chen, X. M. Chen, J. Shu and L. Y. Zhang, *Chem. Eng. J.*, 2023, **452**, 139157.

34. Y. Liu, Y. Shi, C. Gao, Z. Shi, H. Ding, Y. Feng, Y. He, J. Sha, J. Zhou and B. Lu, *Angew. Chem. Int. Ed.*, 2023, e202300016.

35. F. F. Liu, L. F. Wang, F. X. Ling, X. F. Zhou, Y. Jiang, Y. Yao, H. Yang, Y. Shao, X. J. Wu, X. H. Rui, C. X. He and Y. Yu, *Adv. Funct. Mater.*, 2022, **32**, 2210166.
